# Supplementary material
Source: PubMed Central journal article supplement (PMC7646626)
Supplement: NEJMoa2028836_appendix.pdf [file NEJMoa2028836_appendix.pdf]

## Supplementary Appendix

This appendix has been provided by the authors to give readers additional information about their work.

Supplement to: Stone JH, Frigault MJ, Sterling-Boyd NJ, et al. Efficacy of tocilizumab in patients hospitalized with Covid-19. *N Engl J Med*. DOI: 10.1056/NEJMoa2028836

(PDF updated November 2, 2020)

## **Supplementary Appendix**

**Table S1. The BACC Bay Tocilizumab Trial Group**

**Table S2. Clinical Improvement Scale**

**Table S3. Serum C-reactive protein, ferritin, D-dimer, lactate dehydrogenase and interleukin-6 measurements over time.**

**Table S4. Table S4. Sub-Group Effects Of Tocilizumab By Baseline Serum IL-6 Concentration**

**Table S5. Detailed description of Serious Adverse Events.**

**Table S6. List of Other Adverse Events.**

## Table S1. The BACC Bay Tocilizumab Trial Group

### Data and Safety Monitoring Board:

**Gary S. Hoffman (Cleveland Clinic)**

**Arezou Khosroshahi (Emory University)**

**Lisa Bebell (Massachusetts General Hospital)**

**Robert A. Parker (Massachusetts General Hospital)**

### Investigators:

| First Name | Last Name    | Institution |
|------------|--------------|-------------|
| John       | Stone        | MGH         |
| Michael    | Mansour      | MGH         |
| Matthew    | Frigault     | MGH         |
| Cory       | Perugino     | MGH         |
| Pritha     | Sen          | MGH         |
| Tomas      | Neilan       | MGH         |
| Deborah    | Collier      | MGH         |
| Rachel     | Wallwork     | MGH         |
| Megan      | Lockwood     | MGH         |
| Kristin    | D'Silva      | MGH         |
| Jonathan   | Dau          | MGH         |
| Chana      | Sacks        | MGH         |
| Michael    | Dougan       | MGH         |
| Crystal    | North        | MGH         |
| Kathryn    | Bowman       | MGH         |
| Naomi      | Serling-Boyd | MGH         |
| Amna       | Zafar        | MGH         |
| Zsofia     | Drobni       | MGH         |
| Sara       | Schoenfeld   | MGH         |
| Jay        | Khambhati    | MGH         |
| Sebastian  | Unizony      | MGH         |
| Mark       | Matza        | MGH         |
| Arthur     | Kim          | MGH         |
| Janeth     | Yinh         | MGH         |
| Eric       | Meyerowitz   | MGH         |
| Minna      | Kohler       | MGH         |
| Marcy      | Bolster      | MGH         |
| Seth       | Brownmiller  | MGH         |
| Ana        | Fernandes    | MGH         |
| Hannah     | Gilman       | MGH         |
| Sarah      | Hartmann     | MGH         |
| Liam       | Harvey       | MGH         |

|           |             |      |
|-----------|-------------|------|
| Yuan-Di   | Halvorsen   | MGH  |
| Tara      | Thurber     | MGH  |
| Daniel    | Shinnick    | MGH  |
| Linda     | Harrison    | MGH  |
| Nancy     | Yang        | MGH  |
| Ruta      | Shah        | NSMC |
| Ana Maria | Bensaci     | NSMC |
| Patrick   | Lee         | NSMC |
| Usman     | Mughal      | NSMC |
| Caroline  | Cubbinson   | NSMC |
| Sophia    | Chan        | NSMC |
| Sohaib    | Ansari      | NSMC |
| April     | Susan       | NSMC |
| Humaira   | Jami        | NSMC |
| Jade      | Gerbands    | NSMC |
| Matthew   | Basciota    | NSMC |
| Vinit     | Oomen       | NSMC |
| Alexander | Gavralidis  | NSMC |
| Alba      | Coraini     | NSMC |
| Harry     | Schrager    | NWH  |
| David     | Huckins     | NWH  |
| Jason     | Mallada     | NWH  |
| Vinita    | Verma       | NWH  |
| Kayla     | Mckenney    | NWH  |
| Maureen   | Dwyer       | NWH  |
| Yi-Ting   | Chang       | NWH  |
| Ann       | Woolley     | BWH  |
| Sarah     | Nikiforrow  | BWH  |
| Brittany  | Weber       | BWH  |
| Alex      | Liokos (PA) | BWH  |
| Henry     | Rutherford  | BWH  |
| Junghyun  | Kim         | BWH  |
| Viven     | Cheng       | BWH  |
| Karina    | Oganezova   | BWH  |
| Alka      | Patel       | BWH  |
| Jamie     | Myers       | BWH  |
| Kevin     | Zinchuk     | BWH  |
| Nina      | Lin         | BMC  |
| Manish    | Sagar       | BMC  |
| Archana   | Asundi      | BMC  |
| Jennifer  | Bombard     | BMC  |
| Yunhan    | Chen        | BMC  |
| Jasmine   | Huerta      | BMC  |
| Dena      | Kivett      | BMC  |

|           |            |       |
|-----------|------------|-------|
| Samantha  | Roche      | BMC   |
| Athina    | Schmidt    | BMC   |
| Matthew   | Axelrod    | Lahey |
| J. Morgan | Freiman    | Lahey |
| Sarju     | Ganatra    | Lahey |
| Michael   | Pincus     | Lahey |
| Jorge     | Fleisher   | SEMC  |
| Carolina  | Mlynarczyk | SEMC  |
| Tinzar    | Basein     | SEMC  |
| Peter     | LaCamera   | SEMC  |
| Andrew    | Moraco     | SEMC  |
| John      | Tedrow     | SEMC  |
| Claudia   | Nader      | SEMC  |

**Table S2. Ordinal Clinical Improvement Scale**

| Clinical Improvement Scale |                                                                                                                                                                                  |
|----------------------------|----------------------------------------------------------------------------------------------------------------------------------------------------------------------------------|
| 1                          | Discharged (or "ready for discharge" as evidenced by normal body temperature and respiratory rate, and stable oxygen saturation on ambient air or $\leq$ 2L supplemental oxygen) |
| 2                          | Non-ICU hospital ward (or "ready for hospital ward") not requiring supplemental oxygen                                                                                           |
| 3                          | Non-ICU hospital ward (or "ready for hospital ward") requiring supplemental oxygen                                                                                               |
| 4                          | ICU or non-ICU hospital ward, requiring non-invasive ventilation or high-flow oxygen                                                                                             |
| 5                          | ICU, requiring intubation and mechanical ventilation                                                                                                                             |
| 6                          | ICU, requiring ECMO or mechanical ventilation and additional organ support (e.g. vasopressors, renal replacement therapy)                                                        |
| 7                          | Death                                                                                                                                                                            |







**Table S3. Change in inflammatory marker levels by treatment arm.**

| Marker                | Estimated change per day |         | Difference (95% CI)     |
|-----------------------|--------------------------|---------|-------------------------|
|                       | Tocilizumab              | Placebo |                         |
| C-reactive protein    | -0.238                   | -0.092  | -0.146 (-0.166, -0.125) |
| D-dimer               | -0.001                   | 0.008   | -0.009 (-0.023, 0.004)  |
| Ferritin              | -0.059                   | -0.031  | -0.028 (-0.038, -0.018) |
| Lactate dehydrogenase | -0.011                   | -0.018  | 0.006 (0.000, 0.012)    |
| Serum IL-6            | 0.041                    | -0.081  | 0.122 (0.084, 0.162)    |

Table S3 demonstrates the changes over time in patients' serum C-reactive protein, ferritin, interleukin-6, lactate dehydrogenase, and d-dimer concentrations. C-reactive protein and ferritin levels decreased at a faster rate in patients in the tocilizumab group compared to the placebo group. Serum IL-6 levels increased with time in the tocilizumab group but decreased in the placebo group. In contrast, LDH levels decreased faster in patients in the placebo group. Changes in d-dimer concentrations were similar between the two groups. All markers were log-transformed prior to analysis. The estimated change is the change in the mean of the log-transformed outcome per day.

Table S4. Sub-Group Effects Of Tocilizumab By Baseline Serum IL-6 Concentration

| Characteristic             | Hazard ratio (95% CI) in subgroup | Interaction p-value |
|----------------------------|-----------------------------------|---------------------|
| Age                        |                                   | 0.75                |
| > 65 years                 | 0.65 (0.22, 1.92)                 |                     |
| ≤ 65 years                 | 0.63 (0.17, 2.37)                 |                     |
| Sex                        |                                   | 0.92                |
| Male                       | 0.62 (0.21, 1.88)                 |                     |
| Female                     | 0.63 (0.16, 2.47)                 |                     |
| Ethnicity                  |                                   | 0.52                |
| Hispanic or Latino         | 1.36 (0.25, 7.39)                 |                     |
| Not Hispanic or Latino     | 0.67 (0.25, 1.82)                 |                     |
| Obesity                    |                                   | 0.81                |
| BMI ≥ 30 kg/m <sup>2</sup> | 0.56 (0.17, 1.82)                 |                     |
| BMI < 30 kg/m <sup>2</sup> | 0.58 (0.17, 2.02)                 |                     |
| Diabetes                   |                                   | 0.82                |
| Yes                        | 0.70 (0.20, 2.52)                 |                     |
| No                         | 0.92 (0.28, 3.01)                 |                     |
| Serum IL-6                 |                                   | 0.88                |
| > 40 pg/ml                 | 0.77 (0.24, 2.42)                 |                     |
| ≤ 40 pg/ml                 | 0.41 (0.11, 1.58)                 |                     |
|                            |                                   | 0.25                |
| > 24.4 pg/ml               | 0.95 (0.37, 2.42)                 |                     |
| ≤ 24.4 pg/ml               | 0.24 (0.02, 2.43)                 |                     |
| Received remdesivir        |                                   | 0.51                |
| Yes                        | 0.56 (0.16, 1.88)                 |                     |
| No                         | 0.88 (0.29, 2.65)                 |                     |

The results imply the possibility of a reduction in risk of mechanical ventilation or death by tocilizumab among patients with serum IL-6 **less than** the median value at baseline, but the width of the confidence intervals precludes any definitive conclusion regarding impact of tocilizumab in that subgroup.

Table S5. Detailed description of Serious Adverse Events.

## Tocilizumab Group

| RECORD_ID | Type of adverse event      | Grade | Relatedness |
|-----------|----------------------------|-------|-------------|
| BMC-008   | Other                      | 3     | Unrelated   |
| BMC-010   | Other                      | 2     | Unrelated   |
| BMC-010   | Other                      | 2     | Unrelated   |
| BMC-014   | Other                      | 3     | Related     |
| BMC-014   | AST elevated               | 1     | Possibly    |
| BMC-014   | ALT elevated               | 1     | Possibly    |
| BMC-017   | Neutrophil count decreased | 4     | Related     |
| BMC-018   | Neutrophil count decreased | 3     | Related     |
| BMC-020   | Other                      | 3     | Unrelated   |
| BMC-023   | Infection                  | 3     | Unrelated   |
| BMC-023   | Other                      | 3     | Unrelated   |
| BMC-023   | Other                      | 4     | Unrelated   |
| BWH-002   | Other                      | 3     | Unrelated   |
| BWH-002   | Other                      | 2     | Unrelated   |
| BWH-002   | Other                      | 2     | Unrelated   |
| BWH-006   | Death                      | 5     | Unrelated   |
| BWH-023   | Arterial ischemia          | 3     | Unrelated   |
| BWH-023   | Death                      | 5     | Unrelated   |
| MGH-016   | Death                      | 5     | Unrelated   |
| MGH-029   | Death                      | 5     | Possibly    |
| MGH-034   | Other                      | 3     | Unrelated   |
| MGH-041   | Death                      | 5     | Unrelated   |
| MGH-043   | Infection                  | 3     | Possibly    |
| MGH-069   | Other                      | 2     | Unrelated   |
| MGH-072   | Death                      | 5     | Unrelated   |
| NSMC-002  | Infection                  | 3     | Possibly    |
| NSMC-018  | Death                      | 5     | Unrelated   |

| RECORD_ID | Type of adverse event | Grade | Relatedness |
|-----------|-----------------------|-------|-------------|
| NSMC-020  | Stroke                | 3     | Unrelated   |
| NSMC-036  | DVT                   | 2     | Unrelated   |
| NSMC-046  | Death                 | 5     | Possibly    |
| NSMC-047  | Death                 | 5     | Unrelated   |
| NSMC-050  | DVT                   | 3     | Unrelated   |
| NSMC-051  | Stroke                | 2     | Unrelated   |
| NSMC-054  | Infection             | 3     | Possibly    |
| NSMC-063  | PE                    | 3     | Possibly    |
| NSMC-066  | Other                 | 3     | Unrelated   |

#### Placebo Group

| RECORD_ID | Type of adverse event | Grade | Relatedness |
|-----------|-----------------------|-------|-------------|
| BILH-006  | Infection             | 3     | Unrelated   |
| BILH-006  | Death                 | 5     | Unrelated   |
| BMC-009   | Seizure               | 4     | Unrelated   |
| BMC-009   | Infection             | 3     | Related     |
| BMC-009   | Other                 | 3     | Unrelated   |
| BMC-009   | Other                 | 3     | Unrelated   |
| BMC-009   | Other                 | 3     | Unrelated   |
| BMC-009   | Other                 | 3     | Unrelated   |
| BMC-019   | Other                 | 2     | Unrelated   |
| BMC-019   | Other                 | 3     | Unrelated   |
| BMC-019   | Other                 | 3     | Unrelated   |
| BMC-019   | Other                 | 2     | Unrelated   |
| BMC-019   | Other                 | 2     | Unrelated   |
| BMC-019   | Infection             | 3     | Related     |
| BMC-019   | Other                 | 4     | Unrelated   |
| BMC-019   | Other                 | 2     | Unrelated   |
| BMC-019   | Other                 | 3     | Unrelated   |
| BMC-025   | Other                 | 3     | Unrelated   |
| BMC-025   | Other                 | 2     | Unrelated   |

| <b>RECORD_ID</b> | <b>Type of adverse event</b> | <b>Grade</b> | <b>Relatedness</b> |
|------------------|------------------------------|--------------|--------------------|
| BMC-025          | Other                        | 3            | Unrelated          |
| BMC-025          | Other                        | 3            | Unrelated          |
| BMC-025          | DVT                          | 3            | Unrelated          |
| BMC-025          | Other                        | 2            | Unrelated          |
| MGH-017          | Other                        | 3            | Unrelated          |
| MGH-048          | Infection                    | 3            | Possibly           |
| MGH-057          | Myocardial infarction        | 3            | Unrelated          |
| MGH-057          | DVT                          | 2            | Unrelated          |
| MGH-057          | Bleeding                     | 3            | Unrelated          |
| MGH-057          | Infection                    | 3            | Unrelated          |
| MGH-057          | Other                        | 3            | Unrelated          |
| MGH-057          | Infection                    | 3            | Unrelated          |
| MGH-073          | AST elevated                 | 4            | Unrelated          |
| MGH-073          | ALT elevated                 | 3            | Unrelated          |
| NSMC-011         | Death                        | 5            | Unrelated          |
| NSMC-028         | PE                           | 3            | Unrelated          |
| NSMC-065         | PE                           | 3            | Unrelated          |
| NSMC-065         | Death                        | 5            | Unrelated          |
| NSMC-070         | Death                        | 5            | Unrelated          |

Table S6. List of Other Adverse Events Grouped by Treatment Arm and Severity.

## Treatment arm=Tocilizumab SAE?=Yes

| RECORD_ID | Description of adverse event                                                                                                                                     | SAE? | Grade | Relatedness |
|-----------|------------------------------------------------------------------------------------------------------------------------------------------------------------------|------|-------|-------------|
| BMC-008   | Continued anorexia - patient continues inpatient due to refusal of food and IV medications - prolongation of hospitalization due to anorexia and not COVID       | Yes  | 3     | Unrelated   |
| BMC-010   | Hypoxia                                                                                                                                                          | Yes  | 2     | Unrelated   |
| BMC-010   | Orthostatic hypotension after standing up - BP 79/60. IV fluid bolus given with BP back to 120s again. As a note patient has low BP at baseline - .CTCAE grade 2 | Yes  | 2     | Unrelated   |
| BMC-014   | Febrile Neutropenia                                                                                                                                              | Yes  | 3     | Related     |
| BMC-020   | Hypoxia - increase in O2 requirement from 4L to 15L (Grade 3)                                                                                                    | Yes  | 3     | Unrelated   |
| BMC-023   | Elevated PTT                                                                                                                                                     | Yes  | 3     | Unrelated   |
| BMC-023   | Cardiogenic Shock                                                                                                                                                | Yes  | 4     | Unrelated   |
| BWH-002   | hypotension/ neutropenic shock                                                                                                                                   | Yes  | 3     | Unrelated   |
| BWH-002   | Low output from nephrostomy tube                                                                                                                                 | Yes  | 2     | Unrelated   |
| BWH-002   | Hypotension                                                                                                                                                      | Yes  | 2     | Unrelated   |
| MGH-034   | Patient re-hospitalized because dialysis could not be arranged any other way                                                                                     | Yes  | 3     | Unrelated   |
| MGH-069   | Hip fracture requiring hospitalization                                                                                                                           | Yes  | 2     | Unrelated   |
| NSMC-066  | Pulmonary Fibrosis                                                                                                                                               | Yes  | 3     | Unrelated   |

## Treatment arm=Tocilizumab SAE?=No

| RECORD_ID | Description of adverse event                                        | SAE? | Grade | Relatedness |
|-----------|---------------------------------------------------------------------|------|-------|-------------|
| BMC-001   | Acute kidney injury (including elevated creatinine, decreased GFR)  | No   | 2     | Unrelated   |
| BMC-004   | Conjunctivitis                                                      | No   | 1     | Possibly    |
| BMC-005   | decreased wbc count                                                 | No   | 3     | Possibly    |
| BMC-006   | Bradycardia overnight - resolved, no intervention required          | No   | 1     | Unrelated   |
| BMC-008   | decreased WBC count                                                 | No   | 3     | Possibly    |
| BMC-008   | Hypertension - BP of 152/87, asymptomatic, no intervention required | No   | 2     | Possibly    |
| BMC-008   | decreased poly                                                      | No   | .     | Possibly    |
| BMC-008   | Diarrhea - 4 loose BMCTCAE Grade 2                                  | No   | 2     | Unrelated   |
| BMC-012   | Anemia                                                              | No   | 1     | Unrelated   |

| RECORD_ID | Description of adverse event                                                          | SAE? | Grade | Relatedness |
|-----------|---------------------------------------------------------------------------------------|------|-------|-------------|
| BMC-014   | increased alkaline phosphatase                                                        | No   | 1     | Unrelated   |
| BMC-017   | Decreased WBC to 0.8                                                                  | No   | 4     | Possibly    |
| BMC-017   | Diarrhea - 4 watery non bloody bowel movements overnight and 1 this morning (Grade 2) | No   | 2     | Possibly    |
| BMC-020   | Hypotension - BP 80's/40's, 1L IVF given(Grade 2)                                     | No   | 2     | Unrelated   |
| BMC-020   | Earache - given 650mg tylenol with relief(Grade 1)                                    | No   | 1     | Unrelated   |
| BMC-022   | Hypotension 70's/50's, 1L IVF given with good effect(Grade 2)                         | No   | 2     | Unrelated   |
| BMC-023   | Bradycardia                                                                           | No   | 1     | Unrelated   |
| BMC-023   | worsening lower extremity wound                                                       | No   | 3     | Unrelated   |
| BMC-024   | Hypertension - BP 170/93 (Grade 3)                                                    | No   | 3     | Unrelated   |
| BWH-006   | Worsening confusion, Grade 2                                                          | No   | 2     | Unrelated   |
| MGH-003   | Pruritic Rash                                                                         | No   | 1     | Unrelated   |
| MGH-012   | Syncope                                                                               | No   | 1     | Unrelated   |
| MGH-020   | Paroxysmal Atrial fibrillation. Reverted back to sinus rhythm in 10 min               | No   | 1     | Unrelated   |

**Treatment arm=Placebo SAE?=Yes**

| RECORD_ID | Description of adverse event                                                                                                                                                                                                                                    | SAE? | Grade | Relatedness |
|-----------|-----------------------------------------------------------------------------------------------------------------------------------------------------------------------------------------------------------------------------------------------------------------|------|-------|-------------|
| BMC-009   | Tracheostomy                                                                                                                                                                                                                                                    | Yes  | 3     | Unrelated   |
| BMC-009   | Tachypnea - patient experinced episode of tachypnea post bed bath(Grade 3)                                                                                                                                                                                      | Yes  | 3     | Unrelated   |
| BMC-009   | Parasthesia - On 5/26 there was noted change in neurology exam with patient now not withdrawing to pain in upper extremity                                                                                                                                      | Yes  | 3     | Unrelated   |
| BMC-009   | Dysphagia resulting in PEG placement (Grade 3 SAE see below)                                                                                                                                                                                                    | Yes  | 3     | Unrelated   |
| BMC-019   | Hypoxia - worsening hypoxia with ambulation increased from 10L to 15L. Moved to step down for closer monitoring and remained on 15L satting at 95%. On 5/23 weaned to 8L with O2 sat >94%(Grade 2)                                                              | Yes  | 2     | Unrelated   |
| BMC-019   | Worsening hypoxia - patient had grade 2 hypoxia on 5/22 which has increased to a grade 3 today.Today - hypoxia continued to worsen with further increasing oxygen requirements after desatting to the 70's and needed 15L NRB requiring inhaled NO and proningd | Yes  | 3     | Unrelated   |
| BMC-019   | respiratory failure and intubation                                                                                                                                                                                                                              | Yes  | 3     | Unrelated   |
| BMC-019   | Hypotension - thought to be due to sedation and vent setting(Grade 2)                                                                                                                                                                                           | Yes  | 2     | Unrelated   |
| BMC-019   | Bradycardia to the 40's to the point of brief asystole(Grade 2 - serious)                                                                                                                                                                                       | Yes  | 2     | Unrelated   |

| RECORD_ID | Description of adverse event                                                                                                             | SAE? | Grade | Relatedness |
|-----------|------------------------------------------------------------------------------------------------------------------------------------------|------|-------|-------------|
| BMC-019   | Respiratory Acidosis (Grade 4)                                                                                                           | Yes  | 4     | Unrelated   |
| BMC-019   | Hypothermia (Grade 2)                                                                                                                    | Yes  | 2     | Unrelated   |
| BMC-019   | Elevated PTT                                                                                                                             | Yes  | 3     | Unrelated   |
| BMC-025   | Subject had syncopal episode with hypotension while getting up to go to bathroom. Given 1 liter bolus IV fluid with improvement(Grade 3) | Yes  | 3     | Unrelated   |
| BMC-025   | Hypoxia (Grade 2)                                                                                                                        | Yes  | 2     | Unrelated   |
| BMC-025   | Anemia                                                                                                                                   | Yes  | 3     | Unrelated   |
| BMC-025   | Hypertension BP 194/95                                                                                                                   | Yes  | 3     | Unrelated   |
| BMC-025   | Hospitalization for Syncope                                                                                                              | Yes  | 2     | Unrelated   |
| MGH-017   | Grade 3: Rash/allergic reaction (cause not clear. Not related to IP).                                                                    | Yes  | 3     | Unrelated   |
| MGH-057   | Renal injury, started 5/19, serious, expected, unrelated, requiring monitoring                                                           | Yes  | 3     | Unrelated   |

**Treatment arm=Placebo SAE?=No**

| RECORD_ID | Description of adverse event                                                                                       | SAE? | Grade | Relatedness |
|-----------|--------------------------------------------------------------------------------------------------------------------|------|-------|-------------|
| BMC-007   | increased ALP                                                                                                      | No   | 1     | Unrelated   |
| BMC-009   | decreased WBC count                                                                                                | No   | 2     | Possibly    |
| BMC-009   | Diarrhea x5 loose bowel movements (Grade 2)                                                                        | No   | 2     | Unrelated   |
| BMC-016   | Oropharyngeal Dysphagia - patient have difficulty swallowing in setting of COVID-19 and multi-focal PNA            | No   | 2     | Unrelated   |
| BMC-019   | decreased hgb                                                                                                      | No   | 1     | Unrelated   |
| BMC-019   | Hypotension - BP 75/50, 1L IVF given with good effect (Grade 2)                                                    | No   | 2     | Unrelated   |
| BMC-025   | Sinus Tachycardia to 130's                                                                                         | No   | 1     | Unrelated   |
| BMC-025   | Headache                                                                                                           | No   | 1     | Unrelated   |
| BMC-025   | Mild edema                                                                                                         | No   | 1     | Unrelated   |
| BMC-025   | Acute superficial thrombophlebitis                                                                                 | No   | 2     | Unrelated   |
| BMC-026   | Mild LLE Edema                                                                                                     | No   | 1     | Unrelated   |
| BMC-026   | Dizziness                                                                                                          | No   | 1     | Unrelated   |
| BMC-026   | Constipation                                                                                                       | No   | 1     | Unrelated   |
| BWH-003   | intermittent afib with RVR with hypotension requiring IV rate control, hs-cTNT checked and downtrending from prior | No   | 2     | Unrelated   |



| RECORD_ID | Description of adverse event                                                                                                                                                                                                                                  | SAE? | Grade | Relatedness |
|-----------|---------------------------------------------------------------------------------------------------------------------------------------------------------------------------------------------------------------------------------------------------------------|------|-------|-------------|
| BWH-003   | Remains quite delirious and confused. As of today able to grasp meaning of nursing instructions but still difficultly verbalizing - Grade III. Unrelated to drug - likely related to covid. This is prolonging hospitalization but present since admission    | No   | 2     | Unrelated   |
| BWH-003   | Ongoing atrial fibrillation with RVR-intermittent                                                                                                                                                                                                             | No   | 2     | Unrelated   |
| BWH-003   | Overnight had hypotension during HD and episode of epigastric pain, received 2u pRBC and underwent CT abdomen that demonstrated a new wall thickening of the sigmoid colon and rectum most likely representing proctocolitis. No pneumatosis, bowel perforate | No   | 2     | Possibly    |
| BWH-003   | Ongoing elevated lactate with hypotension, echocardiogram today demonstrated worsening LV function with EF 15% with mod-severe MR. Severe RV dysfunction.                                                                                                     | No   | 3     | Unrelated   |
| BWH-008   | As prior, very poorly controlled BP Grade 3 - likely unrelated. Hyperglycemia better controlled tho still up to 380. Confusion and combative - a bit better today, still Grade 3. Also note CK elevated to 1760 on 4/30 (just noted) and coming down, today   | No   | 2     | Unrelated   |
| MGH-057   | hypertensive crisis                                                                                                                                                                                                                                           | No   | 3     | Unrelated   |
| MGH-057   | Anemia, Hgb down to 8.4 and transfused, expected, not serious                                                                                                                                                                                                 | No   | 3     | Unrelated   |
| MGH-057   | Mucus plugging, resolved with bronchoscopy Serious, expected, unrelated, required bronchoscopy                                                                                                                                                                | No   | 3     | Unrelated   |
| MGH-057   | Anemia, Hct crept down to 22                                                                                                                                                                                                                                  | No   | 3     | Unrelated   |
| NSMC-011  | #AKI with AGMA and hyperkalemia                                                                                                                                                                                                                               | No   | 4     | Unrelated   |
| NSMC-035  | hypomagnesemia with Mg 1.6; supplemented with Mg 8 beat run of non sustained V tach on telemetry, without symptoms; no treatment required.                                                                                                                    | No   | 1     | Possibly    |
| NSMC-057  | Anemia Hgb < 7 requiring transfusion of pRBC's                                                                                                                                                                                                                | No   | 2     | Unrelated   |
| NWH-017   | FALL WITH BRUISE TO SHANK                                                                                                                                                                                                                                     | No   | 1     | Unrelated   |
| NWH-017   | FALL WITH ABRASION                                                                                                                                                                                                                                            | No   | 1     | Unrelated   |
| NWH-017   | VOMITING                                                                                                                                                                                                                                                      | No   | 1     | Unrelated   |
