# Supplementary material
Source: PubMed Central journal article supplement (PMC7646626)
Supplement: NEJMoa2028836_data-sharing.pdf [file NEJMoa2028836_data-sharing.pdf]

## Data Sharing Statement

Stone JH, Frigault MJ, Serling-Boyd NJ, et al. Efficacy of Tocilizumab in Patients Hospitalized with Covid-19. N Engl J Med. DOI: 10.1056/NEJMoa2028836.

| Question                                                            | Authors' Response                                                                                              |
|---------------------------------------------------------------------|----------------------------------------------------------------------------------------------------------------|
| Will the data collected for your study be made available to others? | Yes                                                                                                            |
| Would you like to offer context for your decision?                  | —                                                                                                              |
| Which data?                                                         | Complete de-identified patient data set                                                                        |
| Additional information about data                                   | —                                                                                                              |
| How or where can the data be obtained?                              | Please submit requests to Dr. John Stone, <a href="mailto:jhstone@mgh.harvard.edu">jhstone@mgh.harvard.edu</a> |
| When will data availability begin?                                  | January 1, 2021                                                                                                |
| When will data availability end?                                    | —                                                                                                              |
| Will any supporting documents be available?                         | —                                                                                                              |
| Which supporting documents?                                         | Analytic/Statistical code. Informed Consent Form. Other                                                        |
| Additional information about supporting documents                   | Statistical Analysis Plan Data Management Plan                                                                 |
| How or where can supporting documents be obtained?                  | Please submit requests to Dr. John Stone, <a href="mailto:jhstone@mgh.harvard.edu">jhstone@mgh.harvard.edu</a> |
| When will supporting documents availability begin?                  | January 1, 2021                                                                                                |
| When will supporting documents availability end?                    | —                                                                                                              |
| To whom will data be available?                                     | Researchers whose proposed use of the data has been approved.                                                  |
| For what type of analysis or purpose?                               | Any purpose                                                                                                    |
| By what mechanism?                                                  | Following approval of proposal                                                                                 |
| Any other restrictions?                                             | —                                                                                                              |
| Additional information                                              | —                                                                                                              |

This statement was posted on October 21, 2020, at [NEJM.org](https://www.nejm.org).
